# Supplementary material
Source: PubMed Central journal article supplement (PMC6248079)
Supplement: jamaoncol-4-e182178-s001.pdf [file jamaoncol-4-e182178-s001.pdf]

## Supplementary Online Content

Scragg R, Khaw K-T, Toop L, et al. Monthly high-dose vitamin D supplementation and cancer risk: a post hoc analysis of the Vitamin D Assessment randomized clinical trial. *JAMA Oncol*. Published online July 19, 2018. doi:10.1001/jamaoncol.2018.2178

**eFigure.** Mean (95% CI) Observed 25-Hydroxyvitamin D Concentration During Follow-up in the Random Subsample, by Treatment Group

**eTable.** Subgroup Analysis for Secondary Outcomes

This supplementary material has been provided by the authors to give readers additional information about their work.

**eFigure.** Mean (95% CI) Observed 25-Hydroxyvitamin D Concentration During Follow-up in the Random Subsample, by Treatment Group.

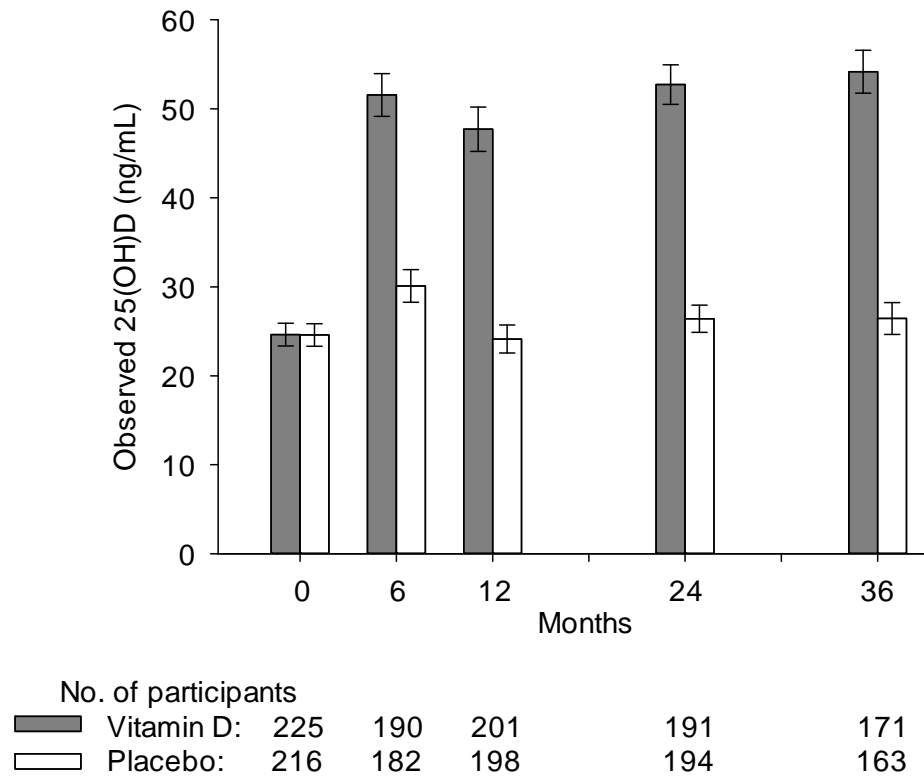

**eTable.** Subgroup Analysis for Secondary Outcomes. Proportion of Participants Having Incident Cancer or Dying of Cancer, During Follow-up, and Hazard Ratios Adjusted for Age, Sex, and Race/Ethnicity, by Study Treatment Group.

| Secondary outcome                                                  | Vitamin D<br>N of events<br>(%) | Placebo<br>N of events<br>(%) | Adjusted Hazard<br>Ratio (95% CI) | P-value<br>(Wald<br>$\chi^2$ ) |
|--------------------------------------------------------------------|---------------------------------|-------------------------------|-----------------------------------|--------------------------------|
| Cancer registrations: randomization to 31 December 2015            |                                 |                               |                                   |                                |
| Males                                                              | 124 (8.2)                       | 122 (8.4)                     | 0.99 (0.77, 1.27)                 | 0.94                           |
| Females                                                            | 64 (6.1)                        | 65 (5.9)                      | 1.01 (0.71, 1.42)                 | 0.98                           |
| 25(OH)D <20 ng/mL                                                  | 43 (7.0)                        | 51 (7.8)                      | 0.96 (0.64, 1.44)                 | 0.84                           |
| 25(OH)D ≥20 ng/mL                                                  | 145 (7.5)                       | 136 (7.2)                     | 1.04 (0.82, 1.31)                 | 0.75                           |
| Cancer registrations: one year after randomization to 31 July 2015 |                                 |                               |                                   |                                |
| Males                                                              | 72 (4.8)                        | 84 (5.8)                      | 0.84 (0.61, 1.15)                 | 0.27                           |
| Females                                                            | 44 (4.2)                        | 38 (3.5)                      | 1.17 (0.76, 1.81)                 | 0.48                           |
| 25(OH)D <20 ng/mL                                                  | 25 (4.1)                        | 33 (5.0)                      | 0.89 (0.52, 1.50)                 | 0.65                           |
| 25(OH)D ≥20 ng/mL                                                  | 91 (4.7)                        | 89 (4.7)                      | 1.01 (0.75, 1.35)                 | 0.97                           |
| Cancer registrations: one year after randomization to 31 Dec 2015  |                                 |                               |                                   |                                |
| Males                                                              | 88 (5.8)                        | 96 (6.6)                      | 0.89 (0.67, 1.19)                 | 0.44                           |
| Females                                                            | 51 (4.9)                        | 50 (4.6)                      | 1.04 (0.70, 1.54)                 | 0.84                           |
| 25(OH)D <20 ng/mL                                                  | 31 (5.1)                        | 42 (6.4)                      | 0.85 (0.53, 1.36)                 | 0.49                           |
| 25(OH)D ≥20 ng/mL                                                  | 108 (5.5)                       | 104 (5.5)                     | 1.02 (0.78, 1.33)                 | 0.91                           |
| All cancer deaths: randomization to 31 December 2015 <sup>a</sup>  |                                 |                               |                                   |                                |
| Males                                                              | 32 (2.1)                        | 34 (2.3)                      | 0.93 (0.58, 1.50)                 | 0.76                           |
| Females                                                            | 12 (1.1)                        | 11 (1.0)                      | 1.07 (0.46, 2.47)                 | 0.87                           |
| 25(OH)D <20 ng/mL                                                  | 16 (2.6)                        | 12 (1.8)                      | 1.57 (0.74, 3.33)                 | 0.24                           |
| 25(OH)D ≥20 ng/mL                                                  | 28 (1.4)                        | 33 (1.7)                      | 0.82 (0.50, 1.36)                 | 0.45                           |

<sup>a</sup> includes deaths from cancer diagnosed before randomization.
